# Supplementary material for: Insight into the chiral induction in supramolecular stacks through preferential chiral solvation
Source: Royal Society of Chemistry journal article supplement (doi:10.1039/c0cc04617e), 2011-01-01
Supplement: c0cc04617e.pdf [file c0cc04617e.pdf]

## **Supporting Information**

### **Insight into the Chiral Induction in Supramolecular Stacks through Preferential Chiral Solvation**

Subi J. George,<sup>a,b</sup> Željko Tomović,<sup>a</sup> Albertus P.H.J. Schenning<sup>\*a</sup> and E.W. Meijer<sup>\*a</sup>

<sup>a</sup> Laboratory of Macromolecular and Organic Chemistry, Eindhoven University of Technology, P. O. Box 513, 5600 MB Eindhoven, The Netherlands. E-mail: [a.p.h.j.schenning@tue.nl](mailto:a.p.h.j.schenning@tue.nl), [e.w.meijer@tue.nl](mailto:e.w.meijer@tue.nl)

<sup>b</sup> Supramolecular Chemistry Laboratory, New Chemistry Unit, Jawaharlal Nehru Centre for Advanced Scientific Research (JNCASR), Bangalore, India-560064

#### **General Methods**

Optical spectroscopy. UV-vis and Circular Dichroism measurement were performed on a Jasco J-815 spectropolarimeter where the sensitivity, time constant and scan rate were chosen appropriately. Corresponding temperature dependent measurements were performed with a PFD-425S/15 Peltier-type temperature controller with a temperature range of 263-383 K and adjustable temperature slope.

**Atomic Force Microscopy (AFM).** AFM images were recorded under ambient conditions using a Digital Instrument Multimode Nanoscope IV operating in the tapping mode regime. Microfabricated silicon cantilever tips (NS) with a resonance frequency of approximately 300 kHz and a spring constant of about 50 Nm<sup>-1</sup> were used. Mica substrates were freshly cleaved before use.

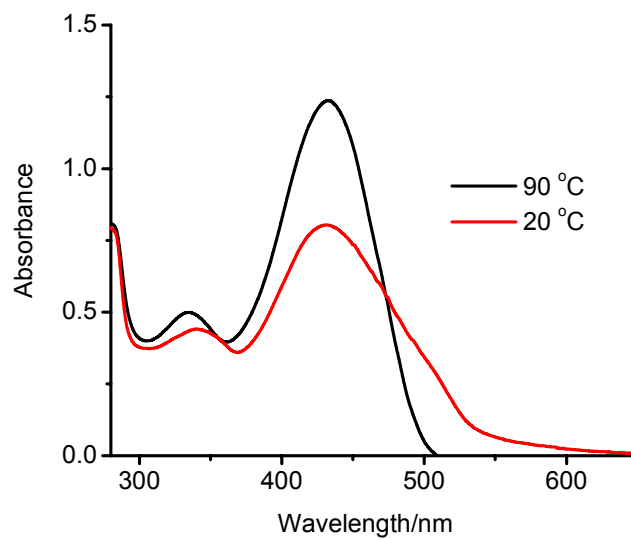

**Fig S1.** Absorption spectra of **A-OPV4UT** ( $2 \times 10^{-4}$  M) in R-citronellol at molecularly dissolved state (90 °C) and at the self-assembled state (20 °C).

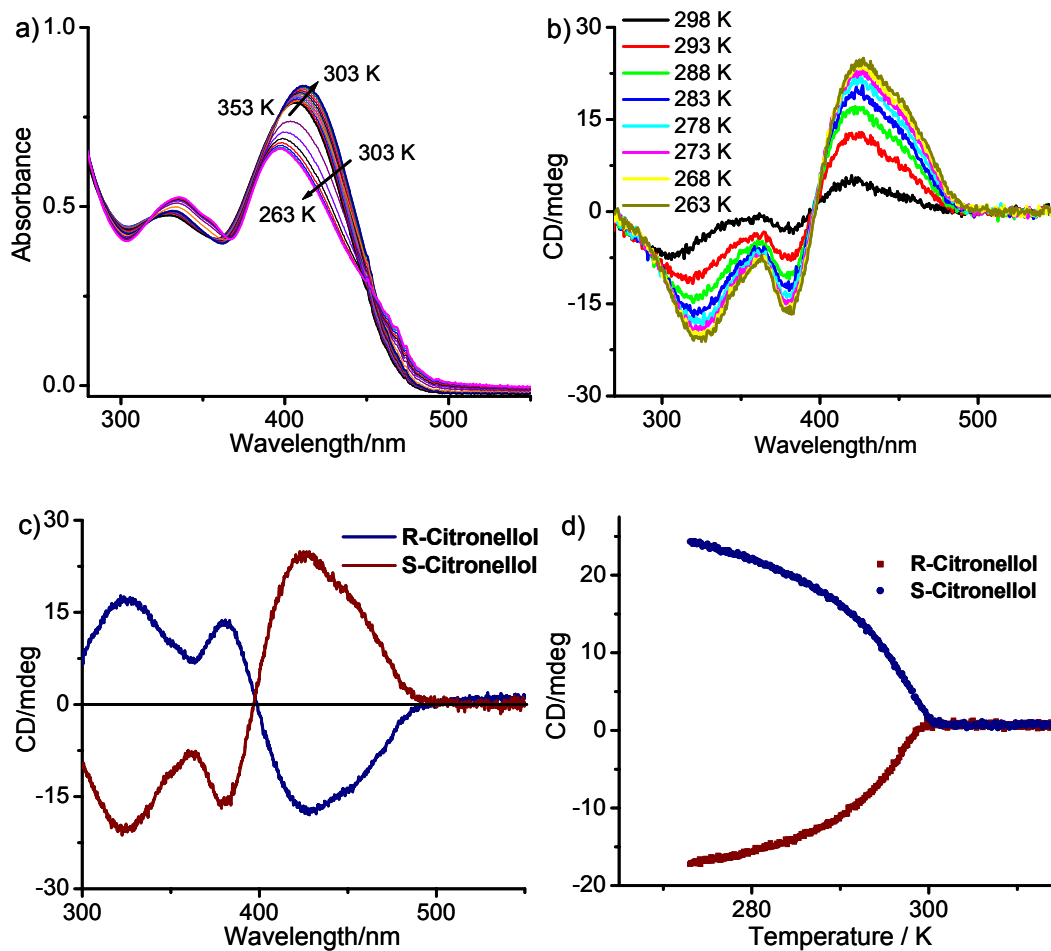

**Fig S2.** Temperature dependent a) absorption and b) CD spectra of **A-OPV3UT** in R-citronellol at an interval of 5 K when cooled from 353 K to 263 K. c) Mirror image CD spectra and d) cooling curves of **A-OPV3UT** in enantiomeric citronellol chiral solvents. The cooling curves are obtained by monitoring the CD intensity at 420 nm ( $2 \times 10^{-4}$  M,  $dT/dt = -60$  K/hr). The difference in CD intensity could be due to the difference in enantiomeric excess (ee); ee of R-citronellol is 98% and that of S-citronellol is > 99%.

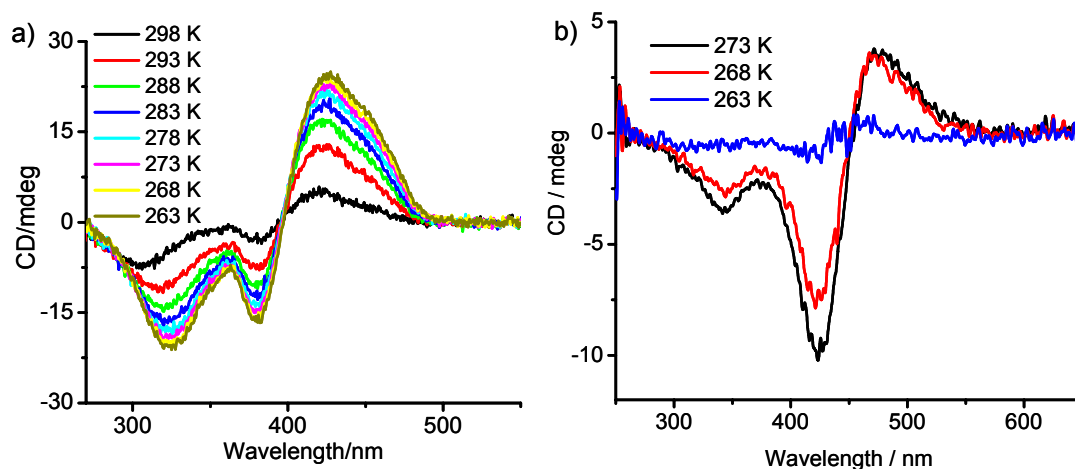

**Fig. S3** Temperature dependent CD spectra of a) **A-OPV3UT** and b) **A-OPV4T** in *S*-citronellol at an interval of 5 K when cooled from molecularly dissolved state ( $2 \times 10^{-4}$  M,  $dT/dt = -60$  K/hr).

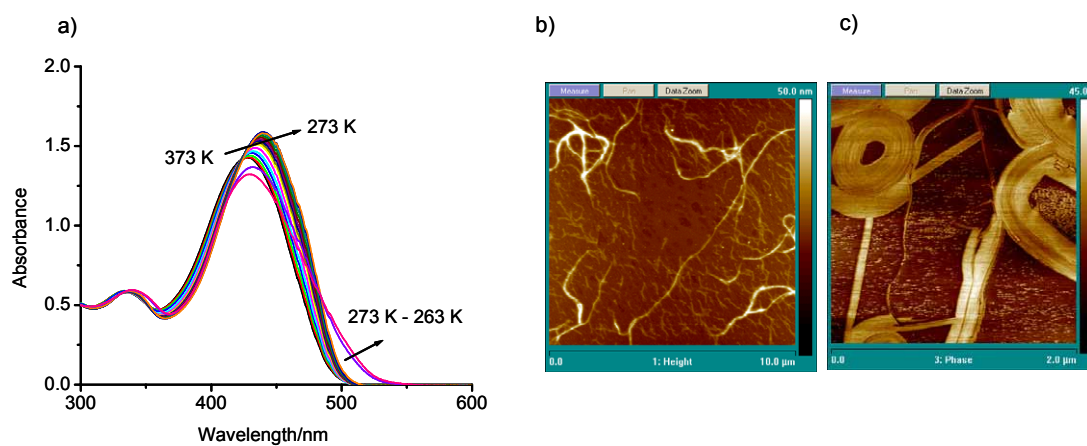

**Fig S4.** (a) Temperature dependent absorption spectra of **A-OPV4T** ( $2 \times 10^{-4}$  M) in *S*-citronellol; (b) and (c) AFM images of the self-assembled fibers of **A-OPV4T** from *S*-citronellol.

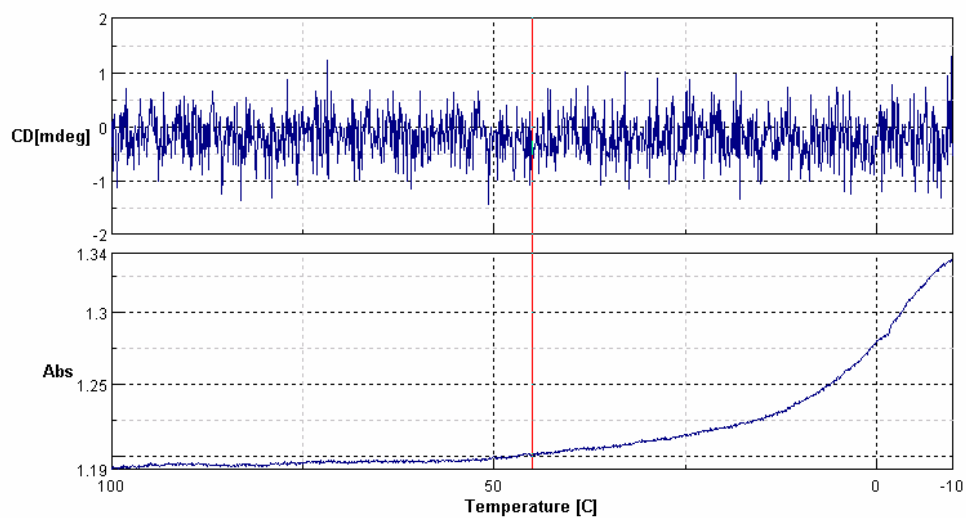

**Fig S5.** CD (top) and absorption (bottom) cooling curves of **AOPV4T** in S-2,6-dimethyl octane. The cooling curves are obtained by monitoring the CD intensity at 470 nm ( $2 \times 10^{-4}$  M,  $dT/dt = -60$  K/hr).
